# Supplementary material for: Exosomal MicroRNAs in Serum as Potential Biomarkers for Ectopic Pregnancy
Source: Hindawi journal article supplement (doi:10.1155/2020/3521859), 2020-01-01
Supplement: f2 [file 3521859.f2.pdf]

Table S1: Positive Predictive Value and Negative Predictive Value of multimarker panels to predict EP or SA or VIP in early symptomatic pregnancies.

| Characteristic     | EP               |      |      | SA               |      |      | VIP              |      |      |
|--------------------|------------------|------|------|------------------|------|------|------------------|------|------|
|                    | AUC (95%CI)      | PPV  | NPV  | AUC (95%CI)      | PPV  | NPV  | AUC (95%CI)      | PPV  | NPV  |
| HCG+P              | 0.81 (0.63-0.99) | 0.73 | 0.88 | 0.63 (0.39-0.86) | 0.45 | 0.84 | 0.67 (0.48-0.85) | 0.61 | 0.85 |
| HCG+P+ miR-100-5P  | 0.87 (0.74-0.99) | 0.89 | 0.89 | 0.69 (0.50-0.88) | 0.38 | 0.93 | 0.79 (0.64-0.94) | 0.67 | 0.87 |
| HCG+P+ miR-122-5P  | 0.82 (0.64-0.99) | 0.80 | 0.88 | 0.68 (0.48-0.88) | 0.36 | 0.93 | 0.70 (0.52-0.88) | 0.58 | 0.90 |
| HCG+P+ miR-146a-5P | 0.88 (0.75-0.99) | 0.63 | 0.95 | 0.64 (0.41-0.87) | 0.50 | 0.85 | 0.78 (0.62-0.94) | 0.70 | 0.88 |
| HCG+P+ miR-184     | 0.82 (0.64-0.99) | 0.80 | 0.88 | 0.67 (0.47-0.88) | 0.38 | 0.93 | 0.68 (0.50-0.86) | 0.65 | 0.81 |
| HCG+P+ miR-215-5P  | 0.88 (0.74-0.99) | 0.89 | 0.89 | 0.68 (0.48-0.88) | 0.38 | 0.93 | 0.78 (0.62-0.93) | 0.63 | 0.92 |
| HCG+P+ miR-378d    | 0.82 (0.64-0.99) | 0.73 | 0.88 | 0.64 (0.42-0.86) | 0.50 | 0.85 | 0.69 (0.51-0.87) | 0.65 | 0.81 |
| ALL*               | 0.89 (0.79-0.99) | 0.67 | 0.95 | 0.69 (0.5-0.88)  | 0.39 | 0.89 | 0.82 (0.69-0.96) | 0.67 | 0.99 |

PPV: Positive Predictive Value; NPV: Negative Predictive Value; P: progesterone; \*ALL= HCG+ progesterone + miR-100-5P+ miR-122-5P+ miR-146a-5P+ miR-184+ miR-215-5P+ miR-378d;
